# Supplementary material for: Nonlinear Gap Junctions Enable Long-Distance Propagation of Pulsating Calcium Waves in Astrocyte Networks
Source: PLoS Comput Biol. 2010 Aug 26;6(8):e1000909. doi: 10.1371/journal.pcbi.1000909 (PMC2928752; doi:10.1371/journal.pcbi.1000909)
Supplement: Table S1 — Parameter list and used values. The parameters of the Li-Rinzel core of the ChI model were taken according to previous studies [De Pittà et al. (2008) Phys Rev E 77: 030903(R); De Pittà et al. (2009) Cogn Proc 10:55 and De Pittà et al. (2009) J Biol Phys 35:38]. Gap junction parameters were chosen in order to allow sufficient diffusion of IP3 across cell borders in order to trigger CICR in neighboring cells. With these parameters, Ca2+ and IP3 oscillations in the simulations show amplitudes that are consistent with those reported in the literature [Politi et al. (2006) Biophys J 90:3120; Mishra and Bhalla (2002) Biophys J 83:1298]. When two values are indicated for the same parameter, the first one corresponds to AFM conditions, the second one to FM conditions. (0.05 MB DOC) [file pcbi.1000909.s007.doc]

| **Parameter** | **Value** (AFM/FM) | **Units** | **Description** |
| --- | --- | --- | --- |
| *Li-Rinzel core parameters* | | | |
| *C0* | 2.0 | M | Total cell free [Ca2+] per cytosolic volume |
| *c1* | 0.185 | – | Ratio between ER and cytosol volumes |
| *rC* | 6.0 | s-1 | Maximal CICR rate |
| *rL* | 0.11 | s-1 | Maximal rate of Ca2+ leak from the ER |
| *vER* | 0.9 | M·s-1 | Maximal SERCA uptake rate |
| *d1* | 0.13 | M | IP3 dissociation constant |
| *d2* | 1.049 | M | Ca2+ inactivation dissociation constant |
| *d3* | 0.9434 | M | IP3 dissociation constant |
| *d5* | 0.08234 | M | Ca2+ activation dissociation constant |
| *a2* | 0.200 | s-1 | IP3R binding rate constant for Ca2+ inhibition |
| *KER* | 0.10 / 0.05 | M | SERCA Ca2+ affinity |
| *IP3 metabolism parameters* | | | |
| *vδ* | 0.12 / 0.7 | M·s-1 | Maximal rate of IP3 synthesis by PLC |
| *KPLC* | 0.1 | M | Ca2+ affinity of PLC |
| *δ* | 1.5 | M | Inhibition constant of PLC activity |
| *v3K* | 4.5 | s-1 | Rate of IP3 degradation by 3K |
| *K3K* | 0.7 | M | Half maximal degradation rate of IP3 by IP3-3K |
| *K3* | 1 | M | Half-saturation constant for Ca2+-dependent IP3-3K activation |
| *r5P* | 0.04 / 0.21 | s-1 | Rate of IP3 degradation by IP-5P |
| *F* | 2 | M·s-1 | Gap junction permeability (or coupling strength) |
| *Nonlinear gap-junction parameters* | | | |
| *IP3*shift | 0.3 | M | Half-maximal diffusion IP3 threshold |
| *IP3*scale | 0.05 | M | Slope factor |
| *IP3*bias | 0.8 / 1.0 | M | Imposed IP3 level in the stimulated cell |
